# Supplementary material
Source: PubMed Central journal article supplement (PMC5837593)

# Men (a)

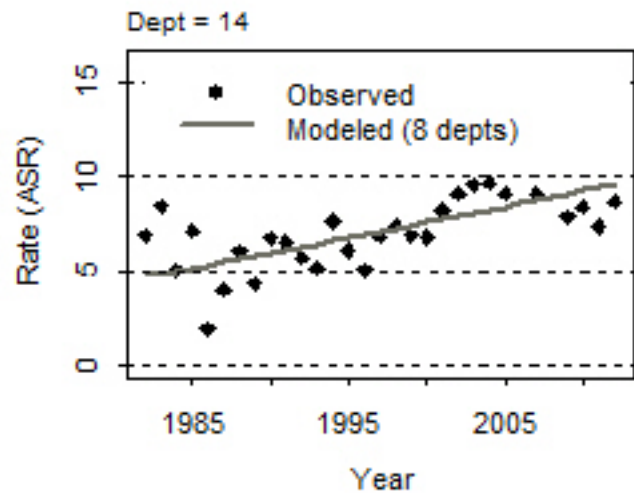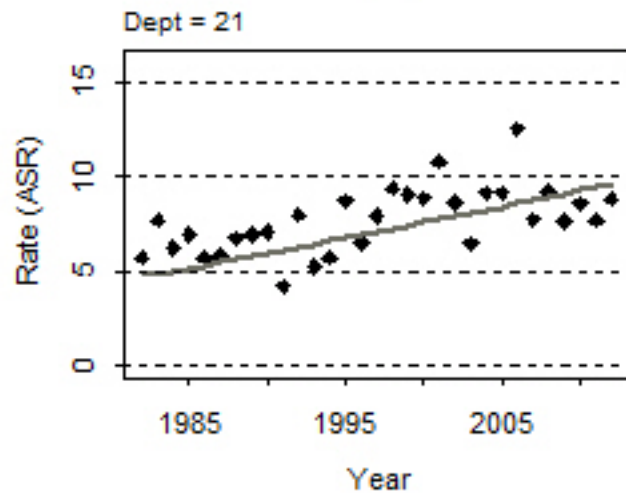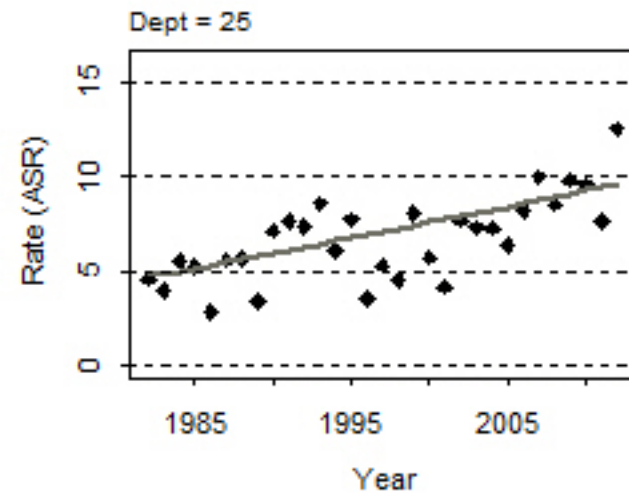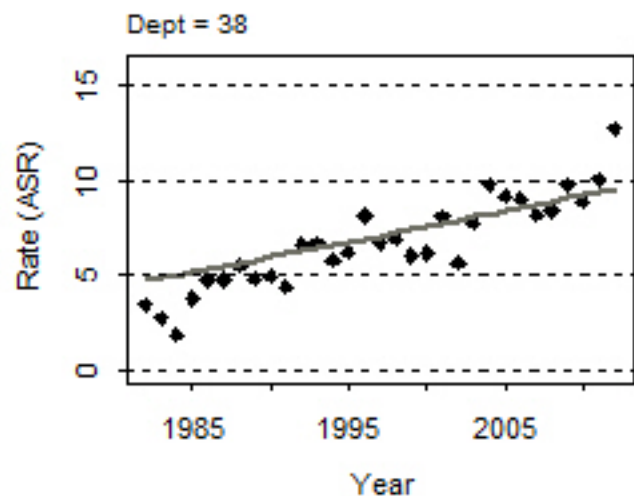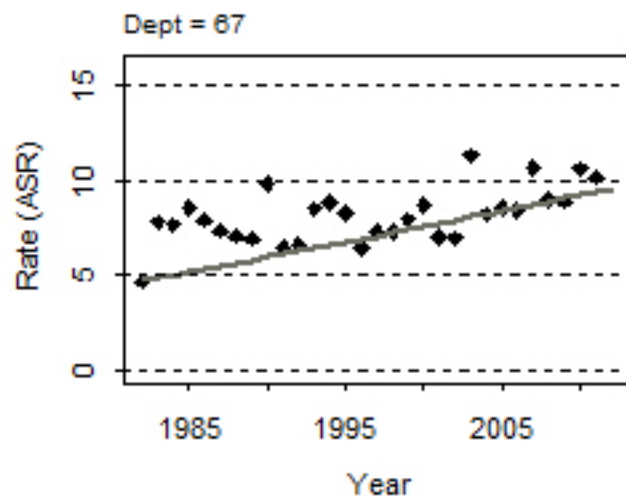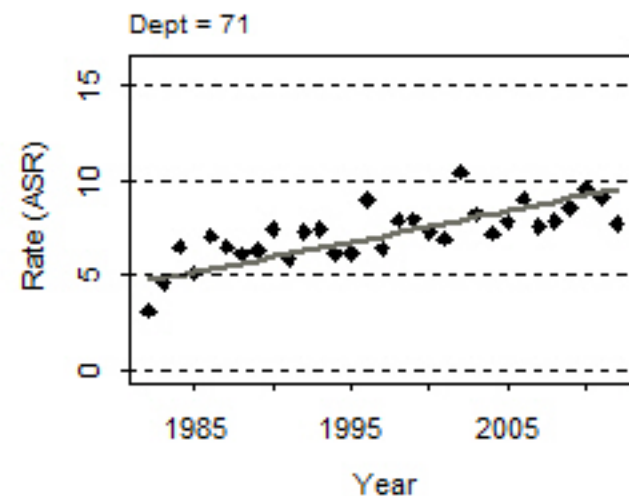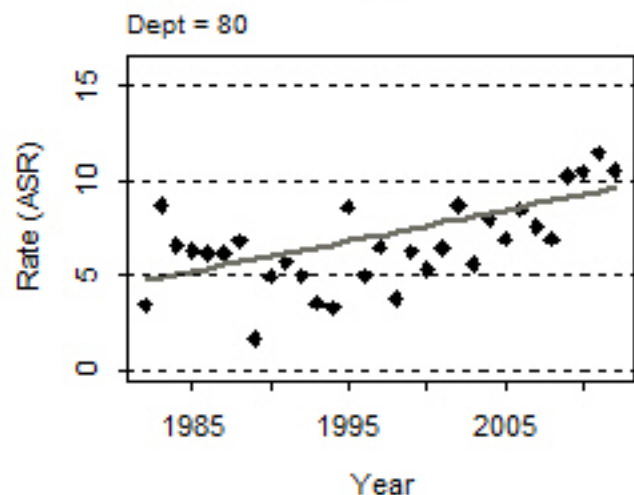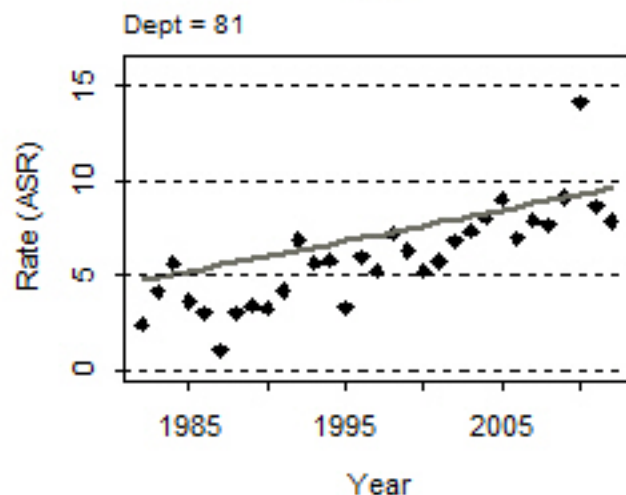

Supplement: ije-2017-01-0030-file009_dyx088.pdf [file ije-2017-01-0030-file009_dyx088.pdf]

# Women (b)

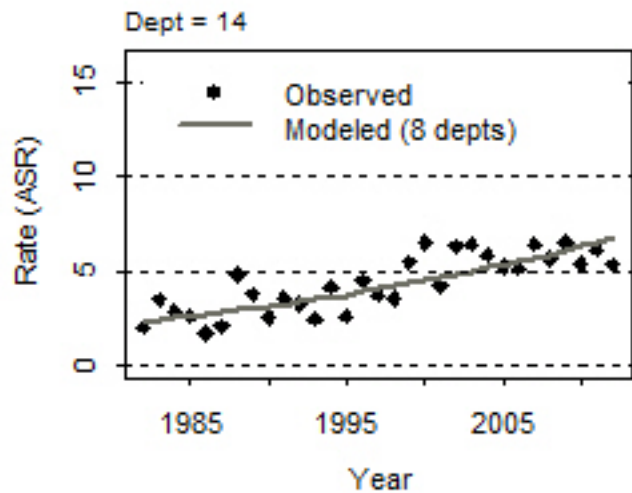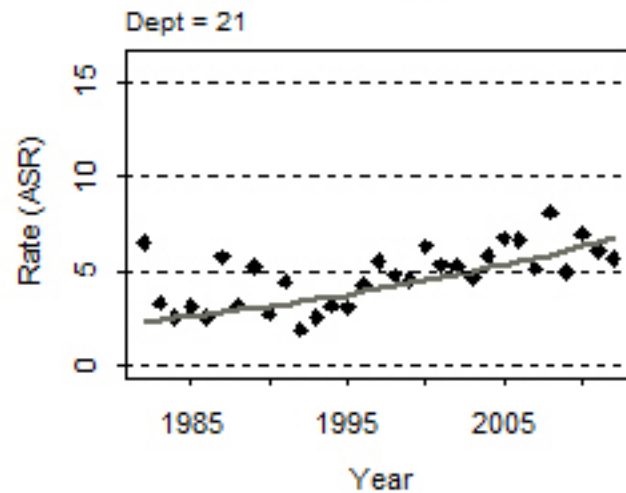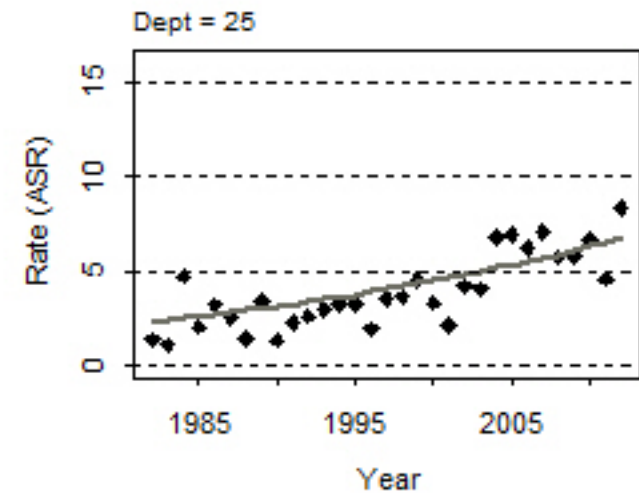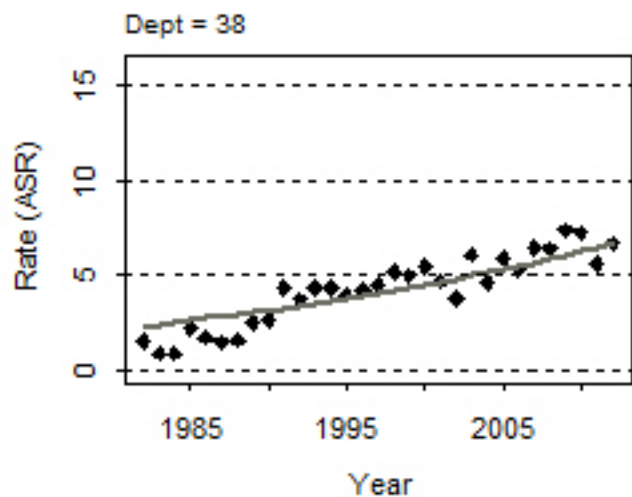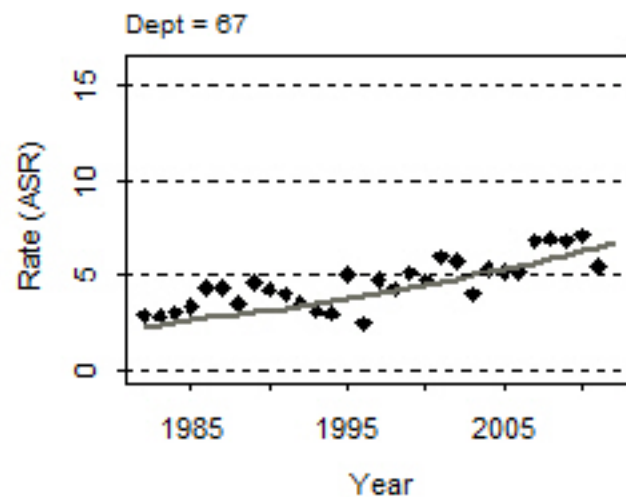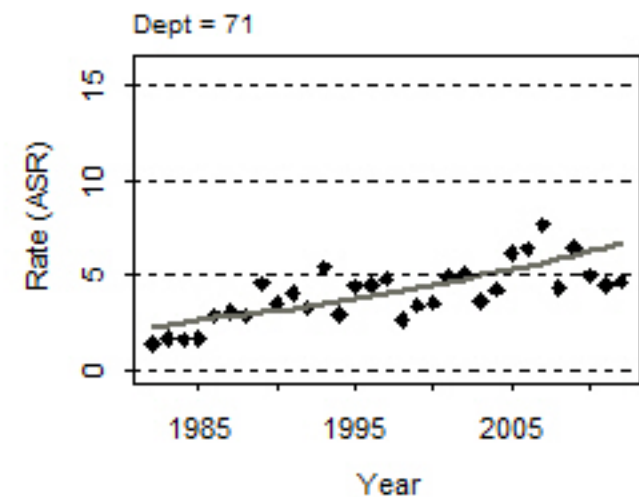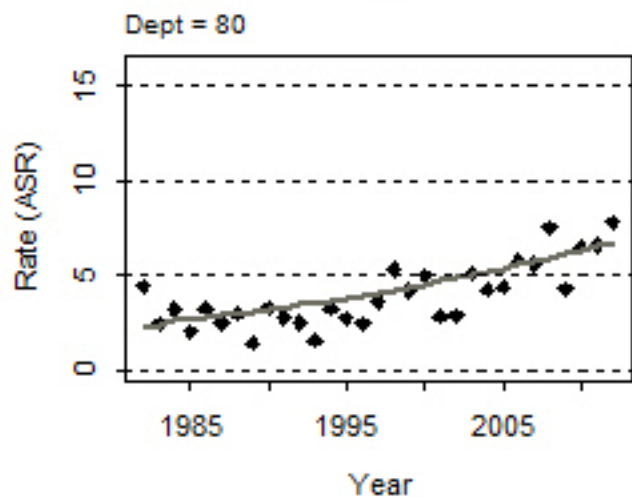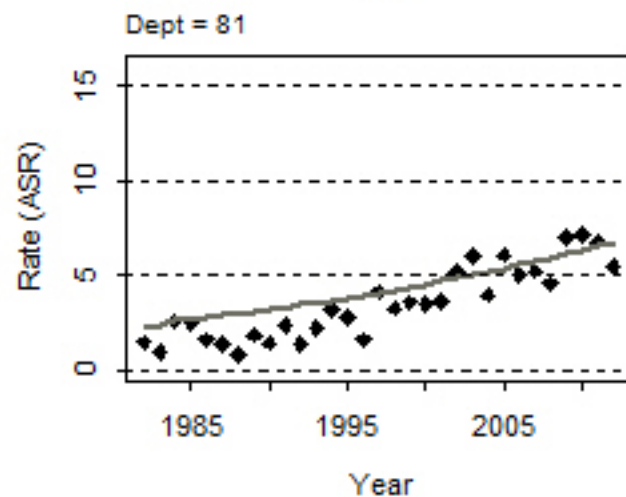

Supplement: ije-2017-01-0030-file010_dyx088.pdf [file ije-2017-01-0030-file010_dyx088.pdf]
